# Supplementary material for: Vepris amaniensis: a morphological, biochemical, and molecular investigation of a species complex
Source: PubMed Central journal article supplement (PMC11438429; doi:10.7717/peerj.17881), 2024-09-25
Supplement: peerj-12-17881-s001.pdf [file peerj-12-17881-s001.pdf]

## Supplemental information

*List of compounds identified and their corresponding samples/fractions. Crude signifies that the compound could be identified in the original extract without separation.*

| DCM extracts                                        |                              |                                                                                                                  |
|-----------------------------------------------------|------------------------------|------------------------------------------------------------------------------------------------------------------|
| Compound                                            | Reference                    | Sample and fraction                                                                                              |
| Tecleanthine (1)                                    | (Atangana et al., 2017)      | GT crude<br>GU5 97<br>GU4 crude<br>GT(1) crude<br>VAK 102<br>WT 33<br>WT(2) crude<br>WU(T) crude<br>WU(K) crude  |
| Evoxanthine (2)                                     | (Ombito, Chi & Wansi, 2021)  | GT crude<br>GU5 112<br>GU4 crude<br>GT(1) crude<br>VAK 111<br>WT 33<br>WT(2) crude<br>WU(T) crude<br>WU(K) crude |
| 6-methoxytecleanthine (3)                           | (Atangana et al., 2017)      | GU5 136<br>VAK 118<br>WT crude<br>WT(2) crude<br>WU(T) crude<br>WU(K) crude                                      |
| Tecleanone (4)                                      | (Casey & Malhotra, 1975)     | GT crude<br>GU5 32-34<br>GU4 crude<br>GT(1) crude<br>VAK crude<br>WT 28-29<br>WT(2) crude                        |
| 1-(3,4-Methylenedioxyphenyl)-1,2,3-propanetriol (5) | (Rahman & Moon, 2007)        | GT crude<br>GT(1) crude<br>GU5 51-55<br>GU4 crude<br>VAK 65<br>WT crude<br>WU(T) crude<br>WU(K) crude            |
| Lupeol (6)                                          | (Ombito, Chi & Wansi, 2021)  | VAK 38<br>WU(K) crude                                                                                            |
| Arborinine (7)                                      | (Langat, Kami & Cheek, 2022) | VAK 72<br>WT crude                                                                                               |

|  |  |                                        |
|--|--|----------------------------------------|
|  |  | GT crude<br>WU(T) crude<br>WU(K) crude |
|--|--|----------------------------------------|

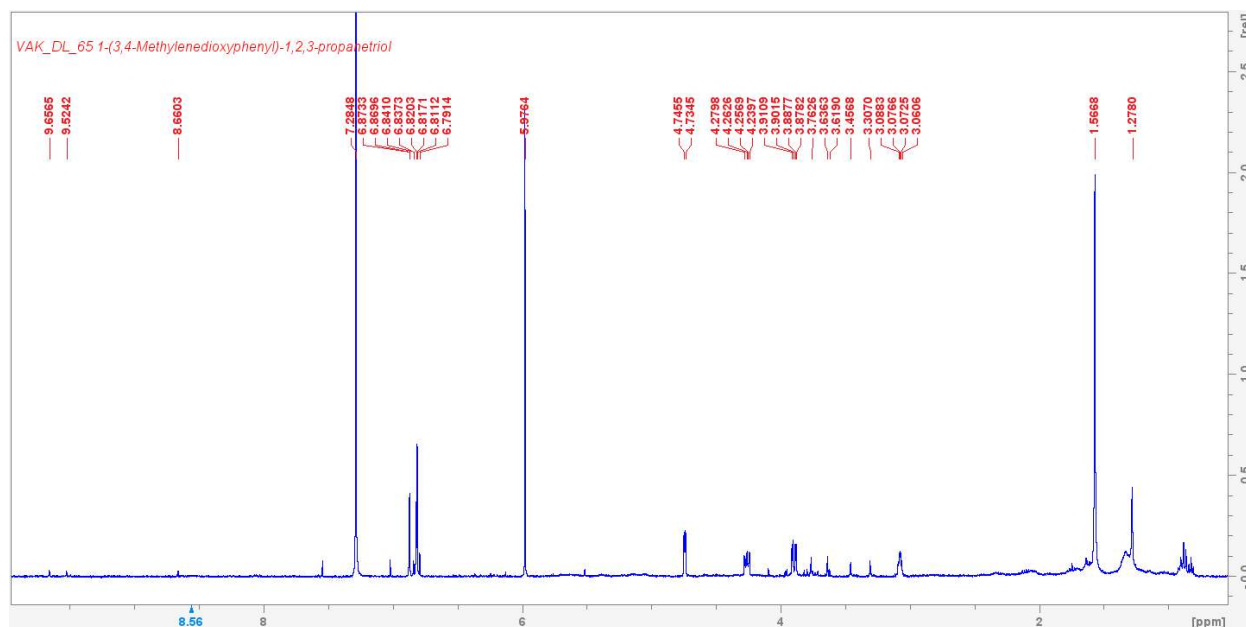

$H^1$  NMR spectra of the lignan, 1-(3,4-Methylenedioxyphenyl)-1,2,3-propanetriol

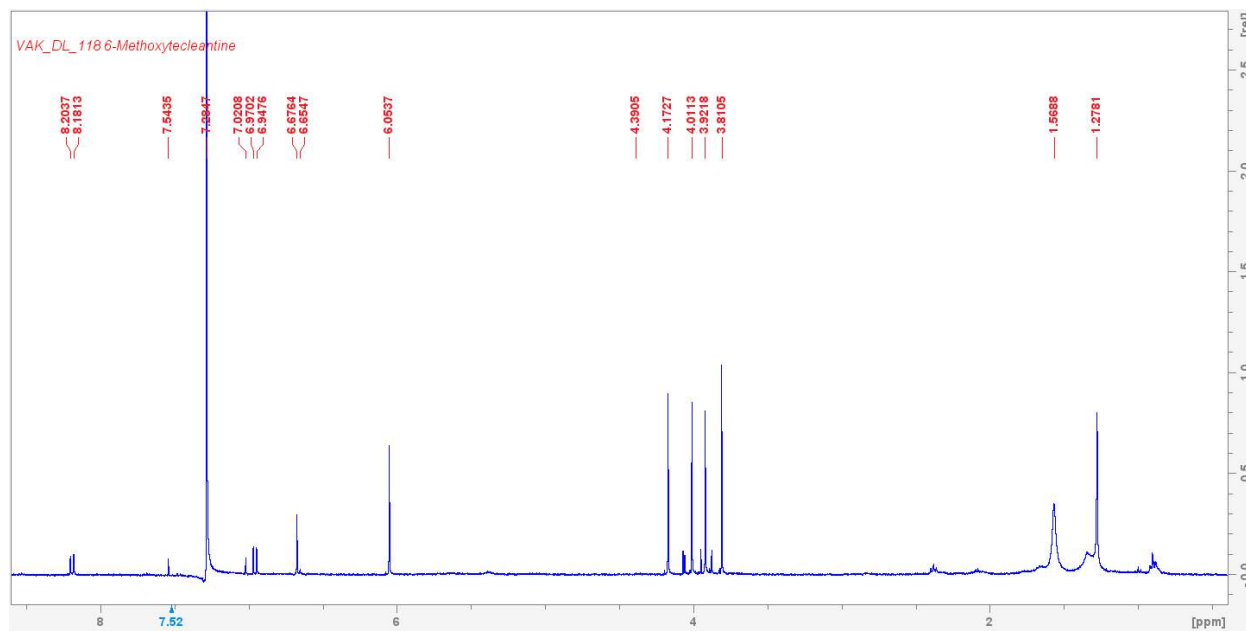

$H^1$  NMR spectra of 6-methoxytecleanthine

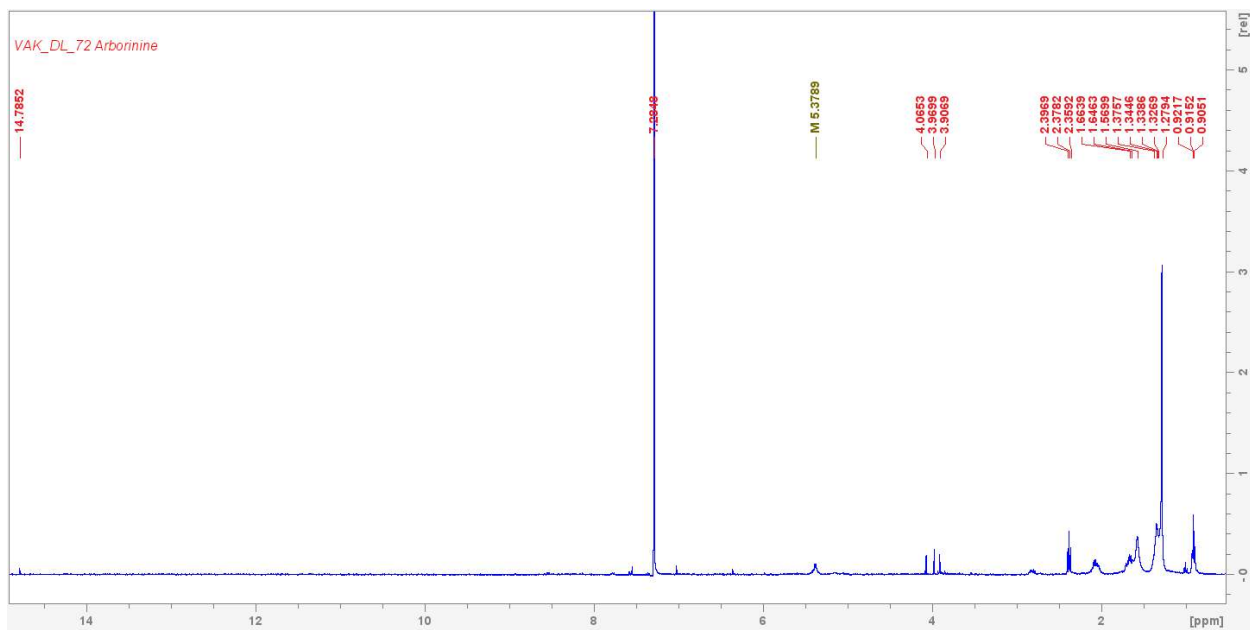

$^1\text{H}$  NMR spectra of arborinine

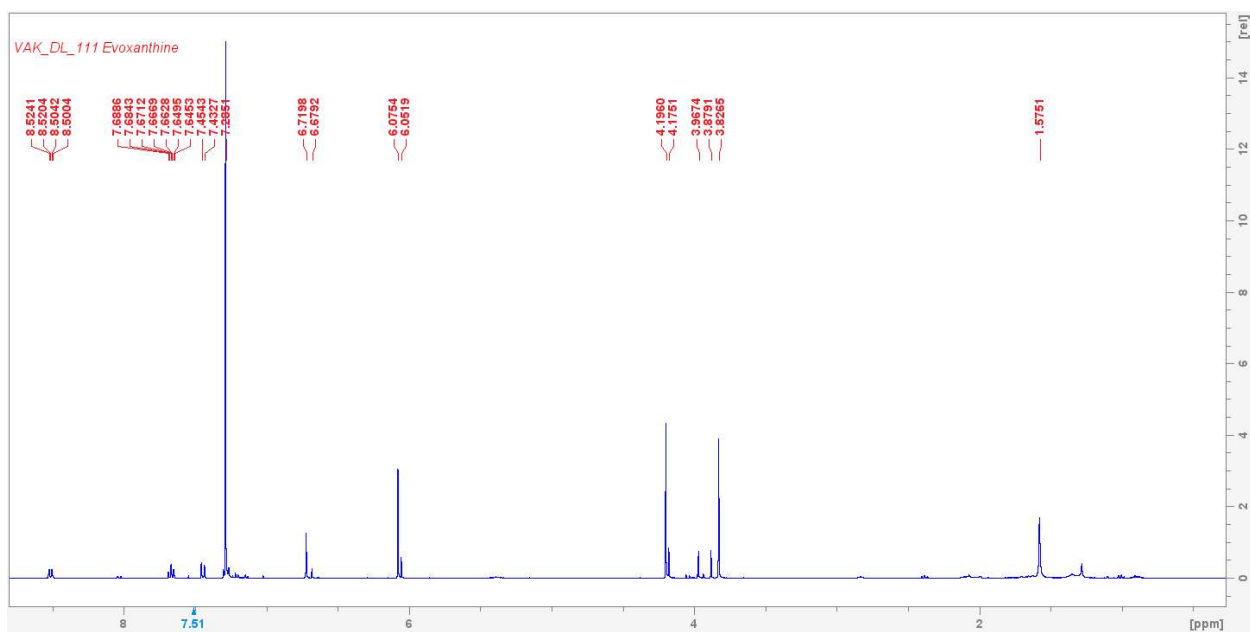

$^1\text{H}$  NMR spectra of evoxanthine

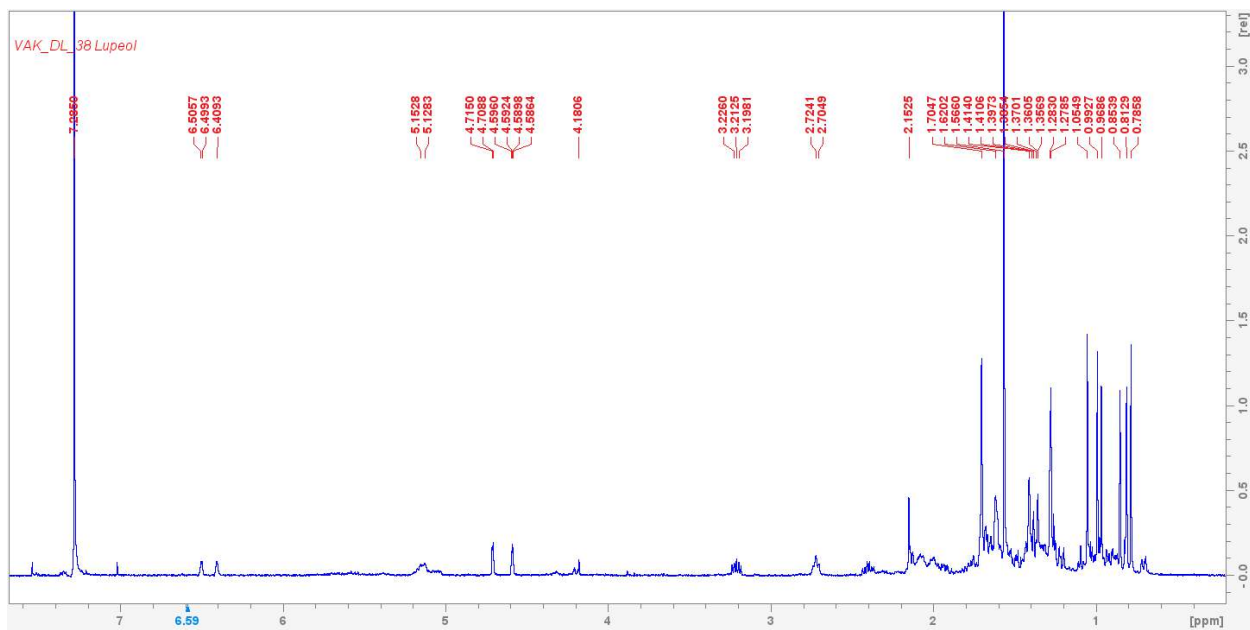

Figure 9.  $^1\text{H}$  NMR spectra of lupeol

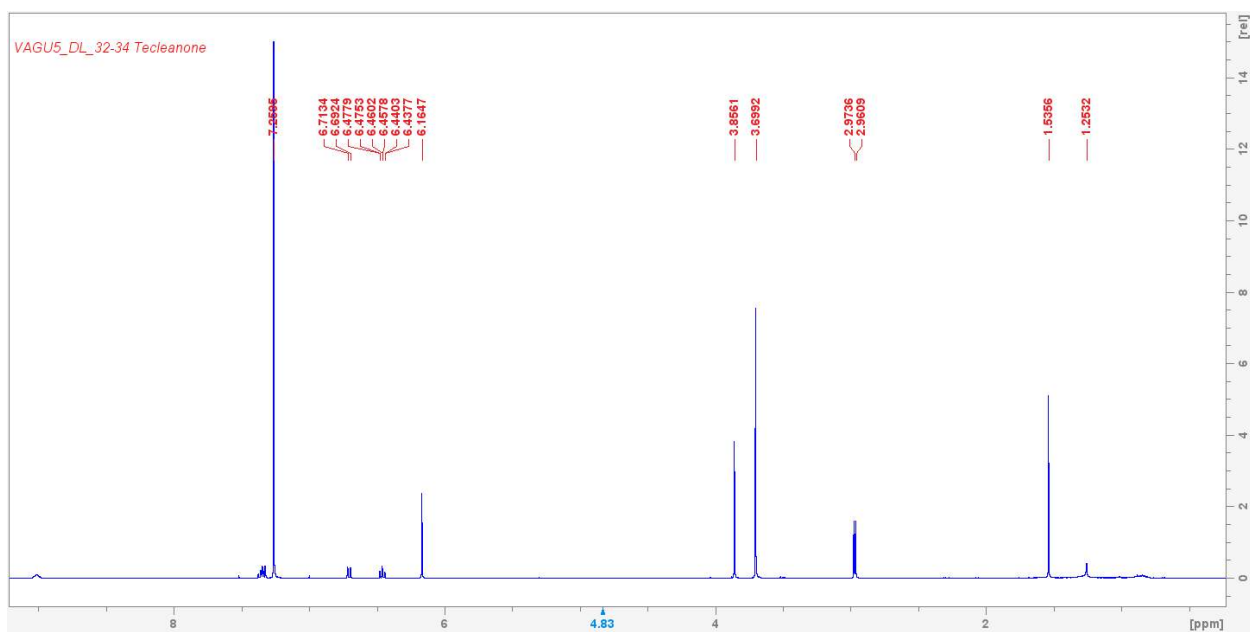

$^1\text{H}$  NMR spectra of tecleanone

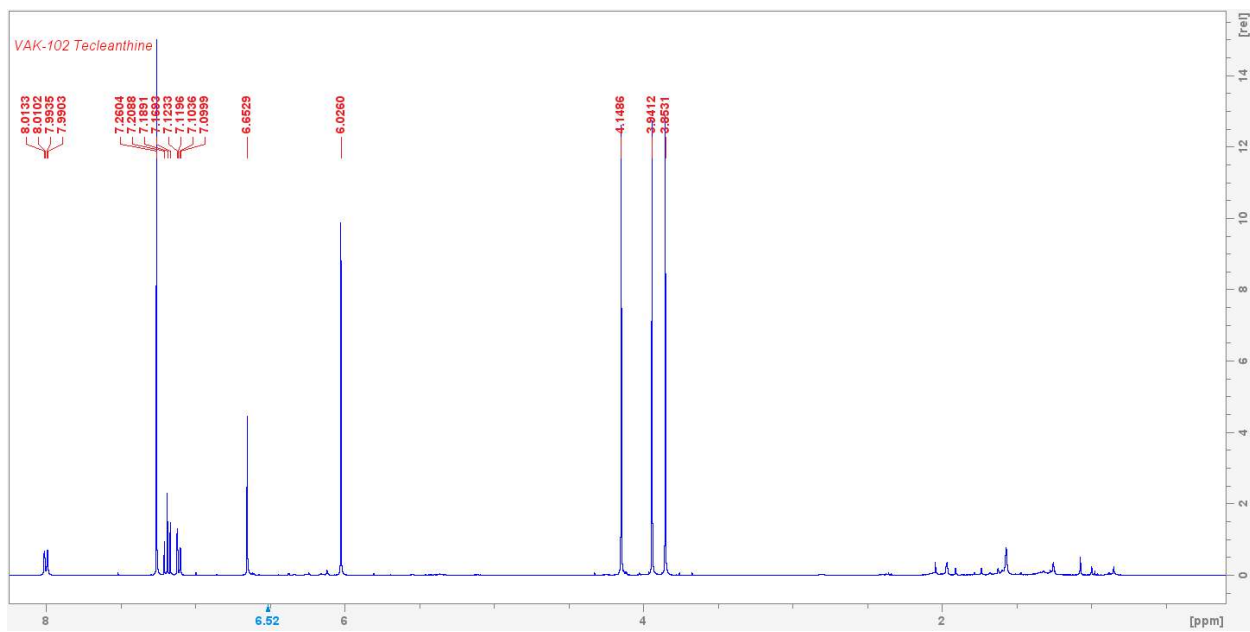

*<sup>1</sup>H* NMR spectra of tecleanthine
