# Supplementary material for: Vepris amaniensis: a morphological, biochemical, and molecular investigation of a species complex
Source: PeerJ. 2024 Sep 25;12:e17881. doi: 10.7717/peerj.17881 (PMC11438429; doi:10.7717/peerj.17881)
Supplement: Supplemental Information 6 [file peerj-12-17881-s006.xlsx]

## Sheet: Gu4, GU5
	Specimen	Ruffo and Mmari 2304, Aug 86, Tanzania Korogwe district, Lutindi forest reserve, shrub c.4 53S 3838E	Ruffo and Amari 2243, 1/7/85, tanzania Muhnea dist, Kwamkoro fr, shrub. 5 10S 38 36E	P.J. Greenway 4895, 10/2/1937, 3500ft, Mgue Sangerawe, 2m shrub 5 08 S 38 37 E	E.B. wallace 939, Oct 1940, West Usambaras, Ambangulis estate, east end of W usambara mts 5 05S 38 26 E	Ruffo and Amari 2306, aug 86, Tanzania, Korogwe dist, lutindi fr, shrub c.4 53S 3838E	Ruffo and Amari 1785, 24/8/86, Tanzania, Korogwe dist, Kilanga fr, shrub 5 18.5 S 38 38 e
	Median Leaf length (cm) Leaf 1.	8	11.35	17.3	20.6	11.6	15.3
LEAFLETS	Leaf 2.	10.25	9.3	13.5	14.2	11.25	17.3
	Leaf 3.	8.8	12.1	12.4	13.9	12.2	12
	Median leaf breadth (cm) Leaf 1.	3.82	4.8	6.2	7.55	3.29	4
	Leaf 2.	4.23	4.5	5.9	6.2	3	4.1
	Leaf 3.	4.1	5.2	4.5	5.75	2.95	2.6
	Ratio lxb leaf 1	2.09:1	2.36:1	2.79:1	2.73:1	3.53:1	3.83:1
	leaf 2	2.42:1	2.07:1	2.29:1	2.29:1	3.75:1	4.22:1
	leaf 3	2.15:1	2.33:1	2.76:1	2.42:1	4.14:1	4.62:1
	Range leaf length	8-10.25	9.3-12.1	12.4-17.3	13.9-20.6	11.25-12.2	12-17.3
	Range leaf width	3.82-4.23	4.5-5.2	4.5-6.2	5.75-7.55	2.95-3.29	2.6-4.1
	Lateral leaf length (cm) Leaf 1.	na	na	na	na	na	na
	Leaf 2.	na	na	na	na	na	na
	Leaf 3.	na	na	na	na	na	na
	Lateral leaf breadth (cm) Leaf 1.	na	na	na	na	na	na
	Leaf 2.	na	na	na	na	na	na
	Leaf 3.	na	na	na	na	na	na
	#2ndry nerves on one side Median leaf 1.	14	19	16	17	18	20
	Median 2.	15	17	13(d)	13(d)	16	22
	Median 3.	18	23	11	13(d)	21	19
	Median leaf acumen length (cm) Leaf 1.	0.9	0.9	0.8	0.8	1.3	1.1
	Leaf 2.	1.1	0.9	missing	missing	1	1.6
	Leaf 3.	0.9	0.8(d)	0.7	missing	1.2	0.8
	Median leaf acumen breadth (mm) Leaf 1.	2.5	2	1.8	4	2.5	3.5
	Leaf 2.	3	3	missing	missing	3	3
	Leaf 3.	5	4(d)	4	missing	3	3
	Petiolule length (cm) Leaf 1.	0.19	0.15	0.4	0.5	0.2	0.1
	Leaf 2.	0.2	0.3	0.28	0.4	0.1	0.2
	Leaf 3.	0.2	0.3	0.1	0.35	0.1	0.1
	Petiole length (cm) Leaf 1.	0.95	1.95	1.8	2.4	1	0.9
	Leaf 2.	1.35	1.3	1.9	1.85	0.98	1.3
	Leaf 3.	1.38	1.9	1.9	4.2	0.7	1.1
	petiol to leaf length	0.12:1	0.17:1	0.1:1	0.12:1	0.09:1	0.06:1
INFLORESCENCE	Inflorescence length (cm) 1.	1.65	2.1	1.1	na	1	3
	Inflorescence length 2.	1.55	2.1	na	na	2.5	1.6
	Inflorescence length 3.	1.9	1.8	na	na	2.1	2.1
	Stem diameter at lowest leafy node (mm) Stem 1.	1.2	3	3	5	2	2.5
	Stem 2.	1	2	na	na	2	1
	Stem 3.	2	1.5	na	na	1	na
	Lenticel (length x breadth) (mm) Lenticel 1.	0.4x0.4	0.21x0.3	0.5x0.5	0.4x0.4	0.33x0.2	0.3x0.3
	Lenticel 2.	0.3x0.3	0.34x0.31	0.31x0.4	0.4x0.3	0.2x0.33	0.4x0.4
	Lenticel 3.	0.4x0.3	0.4x0.15	0.4x0.4	0.5x0.2	0.31x0.21	0.3x0.15
	Internodes (cm) Internode 1.	1.45	2.6	2	1.9	1.9	1.7
	Internode 2.	1.95	1.6	2.6	2	1.25	1.8
	Internode 3.	0.75	3.5	3	1.4	0.95	1.05
FRUIT	Ripe fruit lxb (mm) Fruit 1.	9x6	9x7	na	na	11x5.5	13x8
	Fruit 2.	9.5x6.4	8.5x6.5	na	na	14x9	14x7
	Fruit 3.	10x7	10x7	na	na	13.5x8.5	9.5x5
	Pedicel fruit length (mm) Fruit 1.	4	6.5	na	na	4	2.2
	Fruit 2.	5.2	6	na	na	2.5	2
	Fruit 3.	3.5	4	na	na	3	3
GLAND DOTS	Diameter (mm) Dot 1.	0.1	0.1	0.1	0.1	0.2	0.1
	Density (dots/mm2) Dot 1.	7	5	9	11	6	7
Notes	flowers	na	na	very young buds, hairy all over	na	na	na
	fruits	Large black dots, remainig long hairs, orangish and a bit lobed at bottom	large black dots, long hairs, whiteish ring at bottom lobed, then orange at base. A bit hairy on pedicel	na	na	large, hints of black cratered glands, no hair on the older big ones.young ones have the small balck glands. Orange lobed ish thing at bottom	fruits with small black glands, a few long hairs, orangish lobish at the bottom,
	hairs	on young stems, axillary buds, infl bases, pedicels a bit, whole petioles especially neary tip	on infl, fruit, on young stem and petioles-mostly on base and articulation	a bit more persistant on older stems, all of petiole, articulation, goes up a bit under leaf	stem minutely hairy, bottom/articulation of petiolea a bit hairy	young fruit, yong inflr, bracts definitly, stem not so much, entirepetiole near young fruit.	young stems and petioles, reminants on ifl
	wings	no	no	no	no? bit o f a groove	grooe	grooe
	pulvinus/articulation	articulation at top petiole	articulation at top	pulvinus, top	articulation	pulvinusy art at top	pulvinusy at top
	other	lenticels pretty much absent on one stem. Unifolilate, leaf blade base 'wings' a bit as it gets to articulation.	lenticells ahrd to find, 'winged' slightly at leaf base before articulation	large morelinear leaves, couple look cordate bc of damage	kind of a mess of a specimen	leaves much more lanceollate than others, older fruit	lanceollate leaves again

## Sheet: WU
Unifolilate	Specimen	S. Paulo 168, shrub, Turiani Morogoro district, November 1953 6 09s 37 35e	S.R. Semsei 1508, common shrub, Mtibwa forest reserve, Morogoro district, Nov 1953 c. 6 07s 37 39e	Mgaya 157, July 1957, manyangu fr Morogoro district eastern province, c.6 57 37 34e	D&H 1101, 4.2.1953, Kenya, Mwele mdogo forest shimba hills 12 miles sw of kwale, 400m. 1m shrub 4 18s 39 21e	Luke and robinson 1900, Kenya Kilifi dist, Pangani Rocks, 3940E 0351S, 80m 2m shrub, 16 Aug 89	VAK K7, Luke WRQ, 18906, fno 194, Vepris sp. aff. amaniensis (Engl.) Mziray, K, Kenya kwale county Gongoni FR, 4.42892S 39.46425E, 40m lowland forest, 1.5m shrub, 12/31/2022
	Median Leaf length (cm) Leaf 1.	16.8	12.5	9.8	13.55	12.3
LEAFLETS	Leaf 2.	12.1	7.9	13.8	15.35	9.6
	Leaf 3.	18.7	10.6	16.5	14.7	8.75
	Median leaf breadth (cm) Leaf 1.	4.6	4.4	3.4	6.49	5.35
	Leaf 2.	3.4	3	4.1	5.49	3.9
	Leaf 3.	5.4	4.42	5.3	5.8	3.75
	Ratio lxw	3.65:1	2.84:1	2.88:1	2.09:1	2.3:1
		3.56:1	2.63:1	3.37:1	2.8:1	2.46:1
		3.46:1	2.4:1	3.11:1	2.53:1	2.33:1
	Range leaf length	12.1-18.7	7.9-12.5	9.8-16.5	13.55-15.35	8.75-12.3
	Range leaf width	3.4-5.4	3-4.42	3.4-5.3	5.49-6.49	3.75-5.35
	Lateral leaf length (cm) Leaf 1.	na	na	na	na	na
	Leaf 2.	na	na	na	na	na
	Leaf 3.	na	na	na	na	na
	Lateral leaf breadth (cm) Leaf 1.	na	na	na	na	na
	Leaf 2.	na	na	na	na	na
	Leaf 3.	na	na	na	na	na
	#2ndry nerves on one side Median leaf 1.	16	17	12	17	13
	Median 2.	13	13	13	16	12
	Median 3.	17	16	16	20(o)	11
	Median leaf acumen length (cm) Leaf 1.	1.6	0.5	missing	1.1	0.9
	Leaf 2.	1.2	1	missing	0.8	0.6
	Leaf 3.	1.45	0.3	missing	0.9	0.4
	Median leaf acumen breadth (mm) Leaf 1.	4	5	missing	3.5	5
	Leaf 2.	5.5	5	missing	4.5	3
	Leaf 3.	3	6.5	missing	5.5	2
	Petiolule length (cm) Leaf 1.	0.1	0.1	none	none	0.08
	Leaf 2.	0.1	obscured	none	none	none
	Leaf 3.	0.1	0.05	none	none	none
	Petiole length (cm) Leaf 1.	2.1	0.9	0.5	3	2.6
	Leaf 2.	0.8	obscured	0.4	4.22	1.7
	Leaf 3.	1.8	0.8	0.95	3.6	1.7
	petiole to leaf length	0.13:1	0.07:1	0.05:1	0.22:1	0.21:1
INFLORESCENCE	Inflorescence length (cm) 1.	1.9	obscured	1.5	2.1	0.4
	Inflorescence length 2.	1.05	obscured	1.15	2	0.5
	Inflorescence length 3.	0.9	obscured	0.7	na	0.55
	Stem diameter at lowest leafy node (mm) Stem 1.	2.8	2.5	3.5	3	3
	Stem 2.	na	na	na	na	2
	Stem 3.	na	na	na	na	na
	Lenticel (length x breadth) (mm) Lenticel 1.	0.2x0.12	0.45x0.3	.35x0.29	0.41x0.25	0.35x0.32
	Lenticel 2.	0.3x0.2	0.31x0.4	0.4x0.53	0.6x0.21	0.41x0.45
	Lenticel 3.	0.4x0.2	0.4x0.4	0.5x0.42	0.4x0.38	0.5x0.33
	Internodes (cm) Internode 1.	1.2	0.5	5	2.5	1.8
	Internode 2.	1.25	0.7	2.8	0.5	1.6
	Internode 3.	1.75	1.15	1.7	1.4	2
FRUIT	Ripe fruit lxb (mm) Fruit 1.	4x2	8x5	na	13x5	na
	Fruit 2.	4x2.8	8.5x6.2	na	8x5	na
	Fruit 3.	3.5x2.5	9x5.5	na	19x4.9	na
	Pedicel fruit length (mm) Fruit 1.	3	3	na	2	na
	Fruit 2.	3	2.5	na	2.5	na
	Fruit 3.	2	3	na	1.5	na
GLAND DOTS	Diameter (mm) Dot 1.	0.1	0.11	0.1	0.08	0.1
	Density (dots/mm2) Dot 1.	6	5	7	7	4
Notes	flowers	na	na	male? Have the hairy conical receptical in middle, petals slightly hairy. Peduncle 0.1cm, rahcis 0.5, I nternodes 0.3-0.1	na	buds, have faint yellow dots near tip, held very close together, look young. Male
	fruits	long yellow hairs, sits on 4? Orange lobes/balls above sepals-disk	orangish, small brown dots, long yellow hairs sparsely, similar to Gu broad leaf	na	maybe a few blackish dots. orangeish and a little lobed at bottom.	na
	hairs	stems, petioles, pedicels, long on fruits, all inflor, bracts, sepal tips not surface	sparsely on all of infl and fruit, stems petioles, denser at tip	inflr, sepal, bract pedicel, petiole groove, very sprsely on bud surface, on young stems	base of petiole, articulation, very short hairs on younger stems and few on inlf. Buds hairy the most	hairy infl, stem very sparsely and short haired, some on petiole base, do not see much if any on articulation
	wings	y 2mm wide at top	y c1.5 at top, really wings or canaliculate?	y c2.5mm, doesn’t taper much, hairy in groove	y c5mm at top, tapers a bit	y, doesn’t taper much almost 4mm wide. Rounds out a bit and goes a bit above the articulation
	pulvinus/articulation	y top	y top	y top	articulation at top	art at top
	other	tertiary veins prominent but easy to distinguish from secondaries	tertiary veins prominent but easy to distinguish from secondaries.	very few lenticells, gland dots more obscure as well	gland dots dark brown/black	unifolilate, very similar overall to Robertson and Luke 5848. just the folilacy that is different.

## Sheet: GT
Unifolilate	GT- canaliculate and shows multiple folilacy. Inconspicuous gland dots on petals in bud, open flws only on two buet petals higly reflexed on both. Fruits with distinct lobing +orange at bases, can be slightly beaked. Lobing found in carpels as well.	sheet 1 R.B. Drummond and J.H. Hemsley 3456, 15/7/1953, Tanganyika, Lushoto district, Amani-Kwamkoro road 2mse of amani, 950m50cm shrub	sheet 2 R.B. Drummond and J.H. Hemsley 3456, 15/7/1953, Tanganyika, Lushoto district, Amani-Kwamkoro road 2mse of amani, 950m50cm shrub	Ruffo and Amari 2354, 18/7/86, Tanzania Muheza district, Kwamkoro F.R. Monga, 1000m 5 10S 38 36e	Luke &al 5242, Tanzania East usambara mt, Kwamkoro forest trail 3 mar. 1998 5 10S 38 36e	Mziray 85240, small tree, Tanzania Lushoto district, Usambara mts, Mahezangulu F.R. submontane rainforest, 1200m jan 24, 1985? C4. 25 -5 15s 38 10-38 50e	Jon Lovett 263, Tanzania Lushoto distr, Mazumbai (4 48S 38 30E) west usambara, small tree, university forest reserve, march 1984	Andrews R. Marshall 1423, 7/3/2008, Tanzania near Mazumbai HQ, Muzambai forest reserce West Usambara Mts, Mature forest, 5mtree, 1500m, 444477E 9467127S 4 48s 38 30 e flower dissection	R.M. Polhill, J.M. Lovett 5007, Tanzania Ambangulu tea estate 0502s 3823E, sapling fruits green 17/7/1983	Tanzania Muhera district, Ruffo and Amari 2170 28/6/87 5 10s 38 48 e
	Median Leaf length (cm) Leaf 1.	9.8	9.8	11.5	9.95	12.9	11.8	11.3	11.3	16.7	surface area
LEAFLETS	Leaf 2.	9.25	14.9	7	9.3	15.1	15.8	11.5	15.2	12.1	33.32	34.3	59.8	40.2975	54.825	32.45	37.29	35.03	96.86
	Leaf 3.	12.72	na	13.5	7.1	22.7	8.1	7	10.6	13.4	35.15	70.03	26.6	53.01	64.93	90.06	51.175	69.92	61.71
	Median leaf breadth (cm) Leaf 1.	3.4	3.5	5.2	4.05	4.25	2.75	3.3	3.1	5.8	63.6	#VALUE!	60.75	24.14	161.17	28.35	16.1	29.68	80.4
	Leaf 2.	3.8	4.7	3.8	5.7	4.3	5.7	4.45	4.6	5.1
	Leaf 3.	5	na	4.5	3.4	7.1	3.5	2.3	2.8	6
	Ratio lxb leaf 1	2.88:1	2.8:1	2.21:1	2.46:1	3.04:1	4.29:1	3.42:1	3.65:1	2.88:1
	leaf 2	2.43:1	3.17:1	1.84:1	1.63:1	3.51:1	2.77:1	2.58:1	3.3:1	2.37:1
	leaf 3	2.54:1	#VALUE!	3:1	2.09:1	3.2:1	2.31:1	3.04:1	3.79:1	2.23:1
	Range leaf length	9.25-12.72	9.8-14.9	7-13.5	7.1-9.95	12.9-22.7	8.1-15.8	7-11.5	10.6-15.2	12.1-16.7
	Range leaf width	3.4-5	3.5-4.7	3.8-5.2	3.4-5.7	4.25-7.1	2.75-5.7	2.3-4.45	2.8-4.6	5.1-6
	Lateral leaf length (cm) Leaf 1.	7.3	5.3	9.05	na	9.1	8.45(d)	na	9.6	11.6	surfae area
	Leaf 2.	na	na	9.7	na	6.9	na	9	na	na	20.44	10.6	30.77	#VALUE!	29.12	#VALUE!	#VALUE!	33.6	59.16
	Leaf 3.	na		na	na	na	6.9(d)	4.8	na	na	#VALUE!	#VALUE!	42.68	#VALUE!	16.56	#VALUE!	27.81	#VALUE!	#VALUE!
	Lateral leaf breadth (cm) Leaf 1.	2.8	2	3.4	na	3.2	3.95(d)	na	3.5	5.1	#VALUE!	0	#VALUE!	#VALUE!	#VALUE!	#VALUE!	6.72	#VALUE!	#VALUE!
	Leaf 2.	na	na	4.4	na	2.4	na	3.09	na	na	percentage smaller
	Leaf 3.	na		na	na	na	2.85	1.4	na	na	0.386555	0.690962	0.485452	#VALUE!	0.468855	#VALUE!	#VALUE!	0.0408222	0.389222
	#2ndry nerves on one side Median leaf 1.	20	17	14	14	16	12	12	17	21	#VALUE!	#VALUE!	-0.604511	#VALUE!	0.744956	#VALUE!	0.456571	#VALUE!	#VALUE!
	Median 2.	16	17	12(l)	12	17	13	11	14	16	#VALUE!	#VALUE!	#VALUE!	#VALUE!	#VALUE!	#VALUE!	0.582609	#VALUE!	#VALUE!
	Median 3.	19		12	10	20	11(d)	8	14	20
	Median leaf acumen length (cm) Leaf 1.	1.9	0.5	0.5 (d)	1	0.95	0.7	1	1	0.8
	Leaf 2.	0.4	0.7	0.85(l)	missing	0.75	missing	0.6	1.3	0.8
	Leaf 3.	0.9		0.6	missing	1.05	missing	0.4	0.7	0.6
	Median leaf acumen breadth (mm) Leaf 1.	4	2.9	5 (d)	4.5	4.5	3.5	7	5	5
	Leaf 2.	2	6	4	missing	4.9	missing	6	6	6
	Leaf 3.	4		5	missing	4	missing	3	3	9
	Petiolule length (cm) Leaf 1.	none	obscured	0.2	none	0.2	0.15	0.15	0.3	na
	Leaf 2.	0.1	2	0.3	0.1	0.29	0.2	0.2	0.5	0.4
	Leaf 3.	none		0.28	0.12	0.4	0.1	0.1	0.3	0.3
	Petiole length (cm) Leaf 1.	4.5	2.6	4.85	1	2.25	1.7	1.7	5.5	7
	Leaf 2.	3.3	3.75	3.2	0.82	1.9	1.85	2.95	4	2.2
	Leaf 3.	4.2		2.35	0.9	2.2	2.1	2.1	0.5	3.5
	petiole to leaf length	0.46:1	0.27:1	0.42:1	0.1:1	0.17:1	0.14:1	0.15:1	0.49:1	0.42:1
INFLORESCENCE	Inflorescence length (cm) 1.	2		2.9	0.45	0.9	1.3	1.9	na	na
	Inflorescence length 2.	na		3.8	0.65	0.6	0.95	1.2	na	na
	Inflorescence length 3.	na		1.8	0.8	1.3	1.3	1.4	na	na
	Stem diameter at lowest leafy node (mm) Stem 1.	2		1.8	2	4.8	2	3	3	5
	Stem 2.	na		1.5	na	na	1	2	na	4
	Stem 3.	na		na	na	na	na	na	na	na
	Lenticel (length x breadth) (mm) Lenticel 1.	0.9x.41		0.5x0.4	0.3x0.38	0.4x0.2	0.5x0.3	0.31x0.32	0.5x0.3	0.25x0.25
	Lenticel 2.	0.35x0.5		0.3x0.31	0.4x0.27	0.2x0.4	0.41x0.3	0.3x0.3	0.3x0.5	0.4x0.25
	Lenticel 3.	0.52x0.5		0.24x0.23	0.3x0.4	0.5x0.5	0.5x0.5	0.3x0.4	0.4x0.3	0.4x0.4
	Internodes (cm) Internode 1.	1		2	0.75	11.6	3.6	0.75	1	5.3
	Internode 2.	0.9		1.8	1.1	1.6	0.9	1.4	1.6	3.3
	Internode 3.	1.45		1.2	1	3.3	0.8	1.25	1.4	4.1
FRUIT	Ripe fruit lxb (mm) Fruit 1.	1.25x0.92		10x5.5	na	na	5x3	na	11.5x6	9.5x4.5
	Fruit 2.	na		12x6	na	na	5x3.4	na	10x7	6x3
	Fruit 3.	na		9x4	na	na	4x2.4	na	12x6	11x5
	Pedicel fruit length (mm) Fruit 1.	7		4.5	na	na	5	na	5	6
	Fruit 2.	na		5	na	na	5	na	3	3
	Fruit 3.	na		5	na	na	4.5	na	3	4
GLAND DOTS	Diameter (mm) Dot 1.	not visible for adaxial side	0.1	0.1	0.1	0.1	0.1	0.11	0.1	0.1
	Density (dots/mm2) Dot 1.	not visible for adaxial side	6	6	7	5	13	9	10	5
Notes	flowers	na	na	na	hairy, buds sparsely and randomly	all hairy and immature, petal surface not hairy	Female flowers, four petaled, ovary bumpy 2.4mm tall diameter 1.6mm, stigma oval 1.4mm diameter, infl hairy up until the petals. 4lobed cupifillorm sepals. Petals stronly reflexed c3.2x1.2-1.5mm. Disk 4? Lobed. Peduncle 0.3cm, rachis 0.5cm internodes 0.2	Male, 4-5? Stamens, all infl hairy, sepals hairy at edges, petals not hairy. Hairy conical receptical in the middle. Petals 4 c3.7mm long 0.65mm wide. Pedicel only a few hairs near bottom. Buds have a few hairs on top. Peduncle 0.3cm , rachis 0.9-1.1 internodes 0.1-0.4cm	y	y
	fruits	covered in s mall purpleish glands. Orangish and slightly lobed at bottom	see left	dark brown spots, four lobed orange bit on bottom	na	na	small black dots, have older four lobed organge part at the bottom, some missing or shrunk? Absorbed in?	na	y	y
	hairs	very short fine hairs on petioles and younger stem, in wing grooves	see left	very small on tips, axillary buds petiole bases	all of petiole hairy, extending onto the midrib on abaxial side. Stem hairy, insfl hairy. Sepals on endges hairy , buds slightly hairy.	finely haired on stems, younger especially, densely hairy on inflor axiliary bud. Top and bottom of petiole , also on articulation	infl hairy stems have shrt not super dense hair, on petiole base and articulation, more hiar on tips,	On petiole and articulation, densely hairy on young stems.	y
	wings	y, small	see left	y very small	y very small if at all	y small	y small	yes, small but apparent		y
	pulvinus/articulation	yes top	see left	y top	y top	y top	y top	some not very thick top
	other	leaves uni and difolilate	some trifolilate leaves	trifolilate for the most part		shows a trifolilate lf	female flowers!	uni up tp trifololate
										y
									Redish fruit coered in red glands, reains of bud and speals hae spots and yellow hairs similar to the preceeding speisn. Pediel has reains of hairs. Growing tip covered in yellow simple hairs	pulinus at petiole apex, sloghtly hairy on pedicel, hairy on bracts. Smallish balack dotson fruit .you g stems and nearby petioles hairy, short hairs. Longer ones on bracts.

## Sheet: WT
	WT- winged and displays multiple folilacy, if predominantly uni, there will be tri somewhere. Mostly only buds available andthey have conspicuous gland dots on outside of petals, esp near top. Where open, they are open just barely. Petals thickned at apex. SOme lobing and orange on fruits, some beak	Luke and Robertson 1716, Kenya 102 Kwale Dist- Buda Mafisini forest reserve, 60m, 39 24E 4 27S, 75cm shrub, fruit green, glabrous(?), petioles winged. Feb 24 89	Roberston and Luke 5848, 21.8.89, 0354S 3936E, 120m, Kenya Kilifi district, Kombeni R valley edge of Kaya fimboni, 2m shrub	D. Napper 1380, Kenya, Buda forest reserve Kwale district. Shrub 1-1.5m. 3Nov 1959 c.4 27s 39 24e fruit disection	Robertson and Luke 4538, Kenya Kwale district Muhaka forest, 0420S 3931E, 40m, 19/2/87. shrub 2.5m	sheet 1R.B Drummond and J.H. Hemsley 3802, Kenya Kwale district, Buda Mafisini forest (4 28s 39 22e) 8 miles wsw of Gazi. 80m, coastal forest small shrub, 16.8.1953	sheet 2 R.B Drummond and J.H. Hemsley 3802, Kenya Kwale district, Buda Mafisini forest 8 miles wsw of Gazi. 80m, coastal forest small shrub, 16.8.1953	sheet 3 R.B Drummond and J.H. Hemsley 3802, Kenya Kwale district, Buda Mafisini forest 8 miles wsw of Gazi. 80m, coastal forest small shrub, 16.8.1953	B. Mhoro, UMBCP 329, 13 aug 2000, Tanzania, Mkungwe forest reserve FTEA reagion T6, 1000m, 06deg, 53'S, 037deg55'E, forest shrub 0.5m high, MO!, K!	Kisena 1631, Tanzania T3 Muheza dist, Mtai F.H.,c.4 50s 38 46e, 670m, 13-9-1996, shrub 2.5m high, K! flower disection	S.P. Kibuwa 5459, Tanzania, kiwanda to bulwa footpath, small shrub with greenish white fruit, 10/11/1981	Tanzania korgot? district,lutindi FR 820m Ruffo and Mmari 1724 24/8/86 c. 4 53S 3838E	Ruffo and Amari 2307, 22/1/87, tanzania korogie district 5 09s 38 28 e
	Median Leaf length (cm) Leaf 1.	9.75	13.3	12.6	8	9.85	17.4	10.2	18	9.5	11.9	5.8	12.4	median leaf surface area
LEAFLETS	Leaf 2.	10.2	10.1	8.9	6.4	9.95	14.1	8.9	9.3	13.7	8.2	7.7	9.2	17.6	33.49	107.01	46.92	93.6	27.55	47.6	14.5	39.06
	Leaf 3.	8.9	11.2	10.9	6.15	12.5	7.7	10	10.3	15	7.5	6.5	14.4	17.92	31.3425	73.32	25.365	25.11	52.06	30.34	16.94	28.52
	Median leaf breadth (cm) Leaf 1.	4.3	5.05	4.9	2.2	3.4	6.15	4.6	5.2	2.9	4	2.5	3.15	14.4525	55	24.64	40.5	32.96	70.5	24	14.95	54.72
	Leaf 2.	4.1	3.9	4.5	2.8	3.15	5.2	2.85	2.7	3.8	3.7	2.2	3.1
	Leaf 3.	4.1	4.19	4.15	2.35	4.4	3.2	4.05	3.2	4.7	3.2	2.3	3.8
	Ratio lxb leaf 1	2.27:1	2.63:1	2.57:1	3.64:1	2.9:1	2.83:1	2.22:1	3.46:1	3.28:1	2.98:1	2.32:1	3.94:1
	leaf 2	2.49:1	2.59:1	1.98:1	2.29:1	3.16:1	2.71:1	3.12:1	3.44:1	3.61:1	2.22:1	3.5:1	2.97:1
	leaf 3	2.17:1	2.67:1	2.63:1	2.62:1	2.84:1	2.41:1	2.47:1	3.22:1	3.19:1	2.34:1	2.83:1	3.79:1
	Range leaf length	8.9-10.2	10.1-13.3	8.9-12.6	6.15-8	9.85-12.5	7.7-17.4	8.9-10.2	9.3-18	9.5-15	7.5-11.9	5.8-7.7	9.2-14.4
	Range leaf width	4.1-4.3	3.9-5.05	4.15-4.9	2.2-2.8	3.15-4.4	3.2-6.15	2.85-4.6	2.7-5.2	2.9-4.7	3.2-4	2.2-2.5	3.1-3.8
	Lateral leaf length (cm) Leaf 1.	6.6	5.4	na	6.5(vd)	na	na	7.05	12.6	7.7	8.1 (d)	4.2	na	surfae area
	Leaf 2.	na	na	na	2.4	na	na	5.2	6	9.9	6	2.7	na	#VALUE!	#VALUE!	#VALUE!	25.38	51.66	20.79	#VALUE!	7.56	#VALUE!
	Leaf 3.	na	6.9	8.1	4(vd)	na	na	7.2	8.2	10.1	na	3.8	na	2.64	#VALUE!	#VALUE!	9.88	11.1	31.68	14.4	2.97	#VALUE!
	Lateral leaf breadth (cm) Leaf 1.	2.9	2.1	na	2.9	na	na	3.6	4.1	2.7	3.2	1.8	na	#VALUE!	#VALUE!	#VALUE!	19.44	22.14	39.39	#VALUE!	7.22	#VALUE!
	Leaf 2.	na	na	na	1.1	na	na	1.9	1.85	3.2	2.4	1.1	na	percentage smaller
	Leaf 3.	na	3.15	3.4	3.4(vd)	na	na	2.7	2.7	3.9	na	1.9	na	#VALUE!	#VALUE!	#VALUE!	0.459079	0.448077	0.245372	#VALUE!	0.478621	#VALUE!
	#2ndry nerves on one side Median leaf 1.	10	19	16	7(d)	17	16	11	22	16	15	13	15	0.852679	#VALUE!	#VALUE!	0.610487	0.557945	0.391471	0.525379	0.824675	#VALUE!
	Median 2.	9(d)	18	12	12	18	18	12	14	28	13 (d)	17	10	#VALUE!	#VALUE!	#VALUE!	0.52	0.328277	0.441277	#VALUE!	0.517057	#VALUE!
	Median 3.	9(d)	17	13(d)	11	15	15	15	14	24	12	17	15
	Median leaf acumen length (cm) Leaf 1.	0.55	0.6	0.4	missing	0.9	0.6	0.3	1.7	0.8	1	0.9	0.6
	Leaf 2.	missing	0.6	0.8	0.45	0.9	0.98	0.4	1.3	0.9	missing	0.8	0.3
	Leaf 3.	missing	0.7	missing	missing	0.95	0.3	missing	na	missing	0.2	1	0.5
	Median leaf acumen breadth (mm) Leaf 1.	4	4	4.5	missing	2.5	4	7	7	3	4.5	4.5	3
	Leaf 2.	missing	4.9	5	2.5	3	5.5	4	5	3	missing	4	4
	Leaf 3.	missing	6	missing	missing	3.5	4	missing	na	missing	3.5	4	5
	Petiolule length (cm) Leaf 1.	none	0.15	0.1	0.2	none	none	none	0.3	0.18	0.2	0.1	0.07
	Leaf 2.	0.15	0.19	0.1	0.1	0.07	none	0.8	0.3	0.1	0.1	0.15	none
	Leaf 3.	none	0.15	0.2	0.1	none	0.04	none	0.2	0.1	0.1	2	none
	Petiole length (cm) Leaf 1.	1.9	3.1	1	1	3.29	5.5	2.2	9.7	5.1	missing	1.9	0.85
	Leaf 2.	1.25	2.3	0.9	0.6	2	4.7	1.7	6	6	1.9	1.6	0.5
	Leaf 3.	0.8	3.3	2.5	2.3	3	2.4	4.2	6.65	7	1	0.95	1.65
	petiole length to median leaf length	0.19:1	0.23:1	0.08:1	0.13:1	0.33:1	0.32:1	0.22:1	0.54:1	0.54:1	#VALUE!	0.33:1	0.07:1
INFLORESCENCE	Inflorescence length (cm) 1.	1.4	0.5	1.6	1.7	1.7	2.3	0.7	na	0.5	na	0.7	1.1
	Inflorescence length 2.	1.3	0.52	1.4	1.4	1.6	1.5	0.6	na	0.7	na	0.5	2.1
	Inflorescence length 3.	1.24	0.35	1.35	1.5	1.5	1.6	0.8	na	0.6	na	0.3	1.4
	Stem diameter at lowest leafy node (mm) Stem 1.	2.4	4	4	4	3	4	2.8	2	3	5	1.8	1
	Stem 2.	na	na	na	2	na	na	na	2	na	4	3	3
	Stem 3.	na	na	na	na	na	na	na	1.5	na	na	2	1.4
	Lenticel (length x breadth) (mm) Lenticel 1.	0.45x0.3	0.5x0.32	0.8x0.5	0.4x0.35	0.4x0.4	0.6x0.29	0.4x0.4	0.7x0.3	0.3x0.4	0.4x0.4	0.3x0.4	0.9x0.5
	Lenticel 2.	0.4x0.32	0.48x0.2	0.7x0.4	0.5x0.35	0.4x0.41	0.45x0.3	0.3x0.3	0.3x0.3	0.3x0.3	0.3x0.35	0.2x0.28	0.23x0.35
	Lenticel 3.	0.21x0.41	0.45x2	0.31x0.51	0.4x0.3	0.6x0.4	0.5x0.49	0.5x0.3	0.4x0.5	0.5x0.5	0.3x0.5	0.2x0.2	0.5x0.41
	Internodes (cm) Internode 1.	0.9	2.2	1.8	0.45	1.65	2.1	3.2	3.8	1	1.9	1.1	1
	Internode 2.	1.05	1.8	3.9	1.3	1.7	2.5	1	2.4	6.5	2.2	1.8	0.7
	Internode 3.	2.8	3.25	2.6	1.95	0.7	2.2	2.4	2.2	1.1	2.5	1.25	0.6
FRUIT	Ripe fruit lxb (mm) Fruit 1.	10.5x5	na	9x4	12x5	na	na	na	11x5.5	na	na	na	10x4
	Fruit 2.	10x5	na	9x4	12x4	na	na	na	na	na	na	na	9x5
	Fruit 3.	9.8x5.5	na	10x4	11.5x4.9	na	na	na	na	na	na	na	11x5
	Pedicel fruit length (mm) Fruit 1.	2	na	2.5	1	na	na	na	7	na	na	na	1
	Fruit 2.	1.5	na	2.8	1	na	na	na	na	na	na	na	2.8
	Fruit 3.	1.9	na	2	2	na	na	na	na	na	na	na	3
GLAND DOTS	Diameter (mm) Dot 1.	0.1	0.1	0.1	0.1	0.1	0.1	0.1	0.08	0.1	0.1	0.1	0.11
	Density (dots/mm2) Dot 1.	7	11	8	8	7	5	5	4	9	7	7	12
Notes	flowers	na	Inflr hairy, buds a few hairs. Pedicel and sepals not very hairy, edges of sepals more haired. Very faint yellow dots on petals	na	na	Male flowers, infl somewhat hariy, bracts and sepals hairy. Buds have yellowish dots near tip. Has hairy repcepticle	peduncle 0.3, 0.7cm, rachis 0.9-1.5cm, internodes 0.2,0.4,0.5	see sheet 1	y	Flower buds covered in yellow gland dots, most clustered around the apex. . Male flowers. Flower buds brownish red, are elliposoid 1-3mm long. Bracts form a four lobed cup at the base of pedicels. Raceme?		flower buds with hairy brats and sepals with outside petals with yellow dots	na
	fruits	a few hairs here and there, brown black dots	na	a couple of long hairs, few yellowish dots, small brown dots. A bit orange and lobed at bottom.	slightly haired, pittedorange and lobedish on the bottom.	na	see sheet 1	see sheet 1	Fruit surface has gland dots espeially hairy on stem	stem near apex lightly haired, otherwise generally glabrous			small balck dots, no hairs
	hairs	hairs on growing tip but very sparsely and minutely in other places, articulation, petiole bases. Whats left of infl not really hairy at all	axillary buds hairy, bottoms of petioles, articulation, young stem short hairs not super dense.	very shrot hais on stems and infl. Not very dense on infl. Top bottom of petioles, not very dense and very short.	Very short hairs on stem, some on ifl. Very little on top and bottom of petiole.	hairs on infl, stem hairyish, very small and sparse hairs on articulation	see sheet 1	see sheet 1	Younger stems covered in fine simple hairs yellow	Sepals and bracts slightly hairy at edges hairs are simple and yellow. Pediels lightly haired as well and also carry gland dots	some hair on stems near petiole base and on underside of petiole. Young branch with yellow simple hairs	stems and leaves	on infl, none on petioles, axillary buds hairy
	wings	y, broader at top c3mm	y, 2.4 at top, ffairly regular	y, about 1.8mm at top	y, 2.2 at top	y c2.4 at top	see sheet 1	see sheet 1	Petiole is winged being slightly wider near the leaf base than near the stem (2-3mm wide).	Petiole is winged.1.6mm across	petioles winged at about 2mm	winged	y c2.2 at top
	pulvinus/articulation	articulation at top yes	articulation	yes both ends	articulation top and bottom	articulation at top	see sheet 1	see sheet 1	Artiulation at base of petiole				y top
	other	Most leaves are damaged	gland dots obscured	some uni some trifolilate	very damaged	unifolilate		trifolilate	not many lenticels	All parts of leaves and inflorecesnse have gland dots. Teriaries hard to distinguish from secondaries		trifolilate	2-fioliate a few areas

## Sheet: Amaniensis
amaniensis verifiedd	SP Kibuwa 5343, 27-8-1980, bulwa ukunda, e usambara, mountain evergreen dense forest. Slender shrub 3mtall, bark smooth grey, lvss unifoliate, flws white	J lovett, india ellis and alison keeley 869, aug 3 1986. Muhezz dist, amani forest near guest house, moist forest. 1000m 05 10S 388 35E, small shrub 0.5m tall, fruits reen w orange ring at base.	sp kibuwa 5342, 27-8-1980, bulwa ukunda, e usambara, mt evergreen forest, tall slender shrub 3.5mtall bark smooth grey, fruits greenish white with glands.	AH 3416 22/4/1911	Neotype, RS alumon 6171 5/4/1922, amani (K000593352)	salemani bin kilius? 6142 4/4/1919, amani, Neotype (K000593351)	Verdcourt 122 20iii1950, , small shrub 2-4ft with rather smooth grey bark. Flws greenishovary vermillion, uncomomon. Allanblaclla myrianthus rain forest just below amani, 2900ft. Sheet 1	sheet 2
Median Leaf length (cm) Leaf 1.	15.3	16.3	12.8	13.3	11.2	12.5	12.3
Leaf 2.	16.7	10.4	11.8	14.2	11.1	7.2	9.2
Leaf 3.	15	13.4	10	14.2	10.6	13.1	10.4
Median leaf breadth (cm) Leaf 1.	5.9	6.5	5.4	5.6	5.25	5.5	4.4
Leaf 2.	6.9	5.45	4.4	6.4	4.7	3.5	3.5
Leaf 3.	5.4	5.55	4.5	6	4	6.3	5.3
Ratio lxb leaf 1	2.59:1	2.51:1	2.37:1	2.38:1	2.13:1	2.27:1	2.8:1	#DIV/0!	#DIV/0!	#DIV/0!	#DIV/0!	#DIV/0!
leaf 2	2.42:1	1.91:1	2.68:1	2.22:1	2.36:1	2.06:1	2.63:1	#DIV/0!	#DIV/0!	#DIV/0!	#DIV/0!	#DIV/0!
leaf 3	2.78:1	2.41:1	2.22:1	2.37:1	2.65:1	2.08:1	1.96:1	#DIV/0!	#DIV/0!	#DIV/0!	#DIV/0!	#DIV/0!
Range leaf length	15-16.7	10.4-16.3	10-12.8	13.3-14.2	10.6-11.2	7.2-13.1	9.2-12.3	0-0	0-0	0-0	0-0	0-0
Range leaf width	5.4-6.9	5.45-6.5	4.4-5.4	5.6-6.4	4-5.25	3.5-6.3	3.5-5.3	0-0	0-0	0-0	0-0	0-0
Lateral leaf length (cm) Leaf 1.	na	na	na	na	na	na	na	na	na	na
Leaf 2.	na	na	na	na	na	na	na	na	na	na
Leaf 3.	na	na	na	na	na	na	na	na	na	na
Lateral leaf breadth (cm) Leaf 1.	na	na	na	na	na	na	na	na	na	na
Leaf 2.	na	na	na	na	na	na	na	na	na	na
Leaf 3.	na	na	na	na	na	na	na	na	na	na
#2ndry nerves on one side Median leaf 1.	18	21	13	15	13	10	8
Median 2.	19	14	13	12	10	9	8
Median 3.	15	13	12	13	10(o)	11	7
Median leaf acumen length (cm) Leaf 1.	1.7	1.2	0.7	0.4	0.5	1.2	0.9
Leaf 2.	1.9	1.2	0.7	0.4	miissing	0.7	0.7
Leaf 3.	1.5	1.5	0.5	0.4	0.9	1.1	0.6
Median leaf acumen breadth (mm) Leaf 1.	4	3	3	8	2	5	5.5
Leaf 2.	7	3.5	3	7	misisng	3	5
Leaf 3.	5	2.9	4.8	6	0.5	4.8	4.5
Petiolule length (cm) Leaf 1.	0.3	0.3	0.15	0.3	0.5	0.1	0.1
Leaf 2.	0.3	0.15	0.1	0.2	0.5	0.1	0.1
Leaf 3.	0.35	0.2	0.3	0.2	0.4	missing	0.1
Petiole length (cm) Leaf 1.	1.75	1.4	1.2	0.3	2	1.2	1.2
Leaf 2.	1.5	0.5	0.9	0.8	1.4	0.9	0.9
Leaf 3.	1.7	0.9	1.8	1.3	1	missing	0.8
petiole length to median leaf length	0.11:1	0.09:1	0.09:1	0.06:1	0.18:1	0.1:1	0.1:1	#DIV/0!	#DIV/0!	#DIV/0!	#DIV/0!
Inflorescence length (cm) 1.	3	na	1.5	na	2.2	4.2	1.9
Inflorescence length 2.	1.5	na	1.3	na	4.5	2	2.5
Inflorescence length 3.	2.5	na	1.7	na	2.2	2.3	2
Stem diameter at lowest leafy node (mm) Stem 1.	4	4	2.8	4	2.2	2.8	2
Stem 2.	na	2	2	3	3	na	1.5
Stem 3.	na	na	1.2	na	3	na	2
Lenticel (length x breadth) (mm) Lenticel 1.	0.4x0.3	0.5x0.3	0.2x0.2	0.2x0.5	0.1x0.5	0.2x0.2	0.4x0.3
Lenticel 2.	1x0.4	0.4x0.6	0.5x0.4	.25x.25	0.4x0.3	0.2x.15	0.4x1
Lenticel 3.	0.3x0.2	0.4x0.5	0.4x0.5	.3x.2	0.4x0.6	0.2x0.1	0.6x0.3
Internodes (cm) Internode 1.	1.5	0.7	2.8	2	1.5	1.1	3
Internode 2.	1.3	0.5	1.3	2.4	2	1.8	1.7
Internode 3.	2.4	1.4	1.1	2	1.9	2	0.6
Ripe fruit lxb (mm) Fruit 1.	17x6	1.5x.6	na	15x8	na	na	na
Fruit 2.	na	na	na	na	na	na	na
Fruit 3.	na	na	na	na	na	na	na
Pedicel fruit length (mm) Fruit 1.	nan	na	na	na	na	na	na
Fruit 2.	na	na	na	na	na	na	na
Fruit 3.	na	na	na	na'	na	na	na
Diameter (mm) Dot 1.	0.1	0.1	0.1	0.1	0.1	0.1	0.1
Density (dots/mm2) Dot 1.	5	6	5	6	5	8	5
flowers	y, male, vestigial conical overy covered in hairs, our petals/sstamens. Gland dots at tips. Sepals 4lobed and cupifilorm. Not many hairs	na	female, begingin to be fruit	na	buds, have gland dots	buds w gland dots	femal? Bi? See pollen on four stamens, but also ovary looks ertile, is mostly not airy and is like an inverted wineglass without the standing disk. Gland dots on petlas
fruits	1, oblong matue dark brownish and 2 seeded.	1, brownish, galnd dots and orange lobish ring at bottom - v similar to samples	very immature, still have stiggma. Have lobedish orange base.	one, brwonish, galnd dots, orange lobed base	na	na	na
hairs	new buds are hairy, stem not really, even at apex.	just the very apex of stem puberelent	somestill on ovary, puberelent only at very tip of stem	mostly glabrous, some tiny ones in apex buds	again only very tip has some hairs, sepals cpifilorm/lobed cliate bracteoles a bit hairy	see lefft	moslty glabrous
wings	cannaliculate/teret, obvious pulvinus	terete/cancalicualte barely	no see left	terete to slighltly cancliculate.	terete	terete to ery slightly canaliculate	terete
pulvinus/articulation	obious and scabby	obvious but not v scabby.	articulation yes, pulvinous no	thickend around articulation, ut not scabby	bit of a pulvinous	barely any articulation	subtle articulation
other						almost no lenticells, just at the ery bottom.
